# Supplementary material
Source: HighWire-hosted journal article supplement (https://bmjopen.bmj.com/content/12/4/e057335)
Supplement: inline-supplementary-material-3 [file inline-supplementary-material-3.pdf]

Supplemental Table 2: SDM Courses

| Author          | Year | Country | Cohort                                  | Study aim                                                                                                                                                                                                                             | Design       | Setting & Duration                                         | Content & delivery                                                                                                                                                       | Outcome measures                                                                                                                                                                                                                                                                      | Outcomes                                                                                                                                                                                                                                                                                                                                                  | Outcomes: NWKM                               | Patient outcomes                                                                                                                      |
|-----------------|------|---------|-----------------------------------------|---------------------------------------------------------------------------------------------------------------------------------------------------------------------------------------------------------------------------------------|--------------|------------------------------------------------------------|--------------------------------------------------------------------------------------------------------------------------------------------------------------------------|---------------------------------------------------------------------------------------------------------------------------------------------------------------------------------------------------------------------------------------------------------------------------------------|-----------------------------------------------------------------------------------------------------------------------------------------------------------------------------------------------------------------------------------------------------------------------------------------------------------------------------------------------------------|----------------------------------------------|---------------------------------------------------------------------------------------------------------------------------------------|
| Abbasgholizadeh | 2021 | Iran    | 41 healthcare professionals/trainees    | Assess healthcare professionals' acceptance of and satisfaction with SDM workshop, its impact on their intention to use SDM, and their perceived facilitators and barriers to the implementation of SDM in clinical settings in Iran. | Before-after | Half-day workshop                                          | (1) overall concept of SDM, (2) SDM tools, and (3) measurement of SDM. Delivered using lectures & individual and group activities                                        | Participants completed several questionnaires: sociodemographic, familiarity with SDM, intention to implement SDM, facilitators and barriers of implementing SDM, continuous professional development reaction and workshop evaluation. Quantitative data was analysed descriptively. | Post-workshop, beliefs that practicing SDM would be beneficial and useful and beliefs about capability of using SDM had the strongest influence on intention of practicing SDM. Participants' intention to practice SDM was high following the workshop.                                                                                                  | Level 2 - Commit to change                   | No direct link to patient outcomes, authors stated patients need SDM training                                                         |
| Ajayi           | 2019 | USA     | 30 residents working in palliative care | Evaluate the PERSON mnemonic in training residents to have Goals of Care (GOC) conversations with their patients, and investigated if these skills translated to the bedside with real patient encounters.                            | Before-After | Didactic session with patient actors. Duration: 90 minutes | Short overview of the PERSON mnemonic and the core principles of GOC discussions, introduction to the case study, and a simulated GOC discussion with two patient actors | A pre-/post-baseline survey evaluating the understanding of GOC, and utility of the PERSON mnemonic after intervention; postintervention survey administered 7 months later. The primary outcome of the study was change in perceived utility of the PERSON mnemonic                  | Immediately after the intervention, 29 of 30 residents felt that they understood the mnemonic & this was maintained at 7-month survey; 63% indicated low confidence levels before intervention and 93% (p < 0.01) indicated higher level of confidence immediately after the education and at 7-month postintervention 97% (p < 0.01) indicated sustained | Level 2 - increased knowledge and confidence | Patient-reported outcomes could not be collected or analysed due to low response rates and limited granularity of hospital-level data |

Supplemental Table 2: SDM Courses

| Author          | Year | Country | Cohort                               | Study aim                                                                                                                                                                                                                             | Design                        | Setting & Duration                 | Content & delivery                                                                                                                                 | Outcome measures                                                                                                                                                                                                                                                                      | Outcomes                                                                                                                                                                                                                                                  | Outcomes: NWKM                                                                                                        | Patient outcomes                                                              |
|-----------------|------|---------|--------------------------------------|---------------------------------------------------------------------------------------------------------------------------------------------------------------------------------------------------------------------------------------|-------------------------------|------------------------------------|----------------------------------------------------------------------------------------------------------------------------------------------------|---------------------------------------------------------------------------------------------------------------------------------------------------------------------------------------------------------------------------------------------------------------------------------------|-----------------------------------------------------------------------------------------------------------------------------------------------------------------------------------------------------------------------------------------------------------|-----------------------------------------------------------------------------------------------------------------------|-------------------------------------------------------------------------------|
| Abbasgholizadeh | 2021 | Iran    | 41 healthcare professionals/trainees | Assess healthcare professionals' acceptance of and satisfaction with SDM workshop, its impact on their intention to use SDM, and their perceived facilitators and barriers to the implementation of SDM in clinical settings in Iran. | Before-after                  | Half-day workshop                  | (1) overall concept of SDM, (2) SDM tools, and (3) measurement of SDM. Delivered using lectures & individual and group activities                  | Participants completed several questionnaires: sociodemographic, familiarity with SDM, intention to implement SDM, facilitators and barriers of implementing SDM, continuous professional development reaction and workshop evaluation. Quantitative data was analysed descriptively. | Post- workshop, beliefs that practicing SDM would be beneficial and useful and beliefs about capability of using SDM had the strongest influence on intention of practicing SDM. Participants' intention to practice SDM was high following the workshop. | Level 2 - Commit to change                                                                                            | No direct link to patient outcomes, authors stated patients need SDM training |
| Bentley K       | 2018 | USA     | 28 Psychiatry residents              | Tailor a brief training module to promote awareness of the SDM model.                                                                                                                                                                 | After - with needs assessment | Focus groups and 1.5 hour workshop | 1. Focus groups needs assessment: relationship between decision-making and professional identity, authority & paternalism. 2. 1.5 hour workshop on | Focus groups - qualitative data about identity; post-workshop survey.                                                                                                                                                                                                                 | Interviews uncovered barriers and facilitators. Positive responses to the idea of tailoring SDM workshops around professional identity                                                                                                                    | Level 2 – Participants engaged with focus group & workshop, viewed further SDM training positively; stated commitment | No patient outcomes reported                                                  |

Supplemental Table 2: SDM Courses

| Author          | Year | Country | Cohort                               | Study aim                                                                                                                                                                                                                             | Design        | Setting & Duration                                                           | Content & delivery                                                                                                                | Outcome measures                                                                                                                                                                                                                                                                      | Outcomes                                                                                                                                                                                                                                                 | Outcomes: NWKM              | Patient outcomes                                                              |
|-----------------|------|---------|--------------------------------------|---------------------------------------------------------------------------------------------------------------------------------------------------------------------------------------------------------------------------------------|---------------|------------------------------------------------------------------------------|-----------------------------------------------------------------------------------------------------------------------------------|---------------------------------------------------------------------------------------------------------------------------------------------------------------------------------------------------------------------------------------------------------------------------------------|----------------------------------------------------------------------------------------------------------------------------------------------------------------------------------------------------------------------------------------------------------|-----------------------------|-------------------------------------------------------------------------------|
| Abbasgholizadeh | 2021 | Iran    | 41 healthcare professionals/trainees | Assess healthcare professionals' acceptance of and satisfaction with SDM workshop, its impact on their intention to use SDM, and their perceived facilitators and barriers to the implementation of SDM in clinical settings in Iran. | Before-after  | Half-day workshop                                                            | (1) overall concept of SDM, (2) SDM tools, and (3) measurement of SDM. Delivered using lectures & individual and group activities | Participants completed several questionnaires: sociodemographic, familiarity with SDM, intention to implement SDM, facilitators and barriers of implementing SDM, continuous professional development reaction and workshop evaluation. Quantitative data was analysed descriptively. | Post-workshop, beliefs that practicing SDM would be beneficial and useful and beliefs about capability of using SDM had the strongest influence on intention of practicing SDM. Participants' intention to practice SDM was high following the workshop. | Level 2 - Commit to change  | No direct link to patient outcomes, authors stated patients need SDM training |
| Chesney         | 2018 | Canada  | 18 Senior general surgery residents. | Evaluate senior general surgical residents' acceptance of the Best Case/Worst Case (BC/WC) tool and their attitudes, confidence, and actions before and after training.                                                               | Before-after. | Didactic training, demonstration, practice and debriefing. Duration: 2 hours | Decision support tool with visual aids was used. Teaching used BC/WC scenarios.                                                   | Questionnaires developed to evaluate attitudes, confidence, and actions at 3 time points: before the intervention, after intervention and 6 months after the intervention. Ottawa Decision Support Framework                                                                          | Summative attitudes and confidence scores were not different before and after the intervention; however, action scores were higher after the intervention ( $p = 0.04$ ). Most residents found the training useful.                                      | Level 3 - Behaviour changed | Self-reported use of SDM with patients                                        |

Supplemental Table 2: SDM Courses

| Author          | Year | Country | Cohort                                                                                                                                                      | Study aim                                                                                                                                                                                                                             | Design       | Setting & Duration                                                  | Content & delivery                                                                                                                               | Outcome measures                                                                                                                                                                                                                                                                      | Outcomes                                                                                                                                                                                                                                                  | Outcomes: NWKM             | Patient outcomes                                                              |
|-----------------|------|---------|-------------------------------------------------------------------------------------------------------------------------------------------------------------|---------------------------------------------------------------------------------------------------------------------------------------------------------------------------------------------------------------------------------------|--------------|---------------------------------------------------------------------|--------------------------------------------------------------------------------------------------------------------------------------------------|---------------------------------------------------------------------------------------------------------------------------------------------------------------------------------------------------------------------------------------------------------------------------------------|-----------------------------------------------------------------------------------------------------------------------------------------------------------------------------------------------------------------------------------------------------------|----------------------------|-------------------------------------------------------------------------------|
| Abbasgholizadeh | 2021 | Iran    | 41 healthcare professionals/trainees                                                                                                                        | Assess healthcare professionals' acceptance of and satisfaction with SDM workshop, its impact on their intention to use SDM, and their perceived facilitators and barriers to the implementation of SDM in clinical settings in Iran. | Before-after | Half-day workshop                                                   | (1) overall concept of SDM, (2) SDM tools, and (3) measurement of SDM. Delivered using lectures & individual and group activities                | Participants completed several questionnaires: sociodemographic, familiarity with SDM, intention to implement SDM, facilitators and barriers of implementing SDM, continuous professional development reaction and workshop evaluation. Quantitative data was analysed descriptively. | Post- workshop, beliefs that practicing SDM would be beneficial and useful and beliefs about capability of using SDM had the strongest influence on intention of practicing SDM. Participants' intention to practice SDM was high following the workshop. | Level 2 - Commit to change | No direct link to patient outcomes, authors stated patients need SDM training |
| Harman          | 2019 | USA     | Paediatric and internal medicine hospitalists and trainees. Physician-trainees composed about half of rounding team members, and interns led more than half | Increase use of SDM behaviours by hospitalists and trainees                                                                                                                                                                           | Before-after | Multimodal in the clinical and classroom setting. Duration: 8 weeks | Patient Engagement Project Study intervention included workshops, campaign messaging, report cards, and coaching. Real time feedback during ward | For 12-week pre- and postintervention periods, clinician peers used the 9-point Rochester Participatory Decision-Making Scale (RPAD) to evaluate rounding teams' SDM behaviours during ward rounds                                                                                    | 527 patient encounters were scored during 175 rounds led by 49 hospitalists. Post training Improvement was observed on all 9 SDM behaviours. Mean RPAD score improvement was 1.68 points (95% CI,                                                         | Level 3                    | Qualitative feedback from patients included but no details given.             |

Supplemental Table 2: SDM Courses

| Author          | Year | Country | Cohort                                                 | Study aim                                                                                                                                                                                                                             | Design                          | Setting & Duration                                                                                                                       | Content & delivery                                                                                                                | Outcome measures                                                                                                                                                                                                                                                                      | Outcomes                                                                                                                                                                                                                                                 | Outcomes: NWKM             | Patient outcomes                                                              |
|-----------------|------|---------|--------------------------------------------------------|---------------------------------------------------------------------------------------------------------------------------------------------------------------------------------------------------------------------------------------|---------------------------------|------------------------------------------------------------------------------------------------------------------------------------------|-----------------------------------------------------------------------------------------------------------------------------------|---------------------------------------------------------------------------------------------------------------------------------------------------------------------------------------------------------------------------------------------------------------------------------------|----------------------------------------------------------------------------------------------------------------------------------------------------------------------------------------------------------------------------------------------------------|----------------------------|-------------------------------------------------------------------------------|
| Abbasgholizadeh | 2021 | Iran    | 41 healthcare professionals/trainees                   | Assess healthcare professionals' acceptance of and satisfaction with SDM workshop, its impact on their intention to use SDM, and their perceived facilitators and barriers to the implementation of SDM in clinical settings in Iran. | Before-after                    | Half-day workshop                                                                                                                        | (1) overall concept of SDM, (2) SDM tools, and (3) measurement of SDM. Delivered using lectures & individual and group activities | Participants completed several questionnaires: sociodemographic, familiarity with SDM, intention to implement SDM, facilitators and barriers of implementing SDM, continuous professional development reaction and workshop evaluation. Quantitative data was analysed descriptively. | Post-workshop, beliefs that practicing SDM would be beneficial and useful and beliefs about capability of using SDM had the strongest influence on intention of practicing SDM. Participants' intention to practice SDM was high following the workshop. | Level 2 - Commit to change | No direct link to patient outcomes, authors stated patients need SDM training |
|                 |      |         | of patient encounters                                  |                                                                                                                                                                                                                                       |                                 |                                                                                                                                          | rounds was given.                                                                                                                 |                                                                                                                                                                                                                                                                                       | 1.33 to 2.03; P < .001)                                                                                                                                                                                                                                  |                            |                                                                               |
| Huffmann        | 2021 | USA     | 97 developmental-behavioural paediatrics (DBP) fellows | Compare two interventions for autism-focused, online, interactive case-based trainings on SDM. Comparison of direct vs indirect teaching methods.                                                                                     | Quasi-RCT pre- and post-surveys | 2 autism-focused, online, interactive case-based trainings on SDM. Intervention: 53 fellows. Comparison: 44 fellows. Average duration of | This was a single-blinded, quasi-randomized controlled trial (quasi-RCT) designed to compare the effects of SDM-focused versus an | Use of pre-training and post-training online surveys (Shared Decision-making Questionnaire Physician Scale & Leeds Attitudes toward Concordance II instrument) to assess knowledge and attitudes about                                                                                | Both interventions significantly improved participant's reporting of SDM using self-report but not medication-prescribing concordance. Both groups' SDM knowledge                                                                                        | Level 3                    | No patient outcomes reported.                                                 |

Supplemental Table 2: SDM Courses

| Author          | Year | Country | Cohort                               | Study aim                                                                                                                                                                                                                             | Design                             | Setting & Duration                                            | Content & delivery                                                                                                                | Outcome measures                                                                                                                                                                                                                                                                      | Outcomes                                                                                                                                                                                                                                                 | Outcomes: NWKM             | Patient outcomes                                                              |
|-----------------|------|---------|--------------------------------------|---------------------------------------------------------------------------------------------------------------------------------------------------------------------------------------------------------------------------------------|------------------------------------|---------------------------------------------------------------|-----------------------------------------------------------------------------------------------------------------------------------|---------------------------------------------------------------------------------------------------------------------------------------------------------------------------------------------------------------------------------------------------------------------------------------|----------------------------------------------------------------------------------------------------------------------------------------------------------------------------------------------------------------------------------------------------------|----------------------------|-------------------------------------------------------------------------------|
| Abbasgholizadeh | 2021 | Iran    | 41 healthcare professionals/trainees | Assess healthcare professionals' acceptance of and satisfaction with SDM workshop, its impact on their intention to use SDM, and their perceived facilitators and barriers to the implementation of SDM in clinical settings in Iran. | Before-after                       | Half-day workshop                                             | (1) overall concept of SDM, (2) SDM tools, and (3) measurement of SDM. Delivered using lectures & individual and group activities | Participants completed several questionnaires: sociodemographic, familiarity with SDM, intention to implement SDM, facilitators and barriers of implementing SDM, continuous professional development reaction and workshop evaluation. Quantitative data was analysed descriptively. | Post-workshop, beliefs that practicing SDM would be beneficial and useful and beliefs about capability of using SDM had the strongest influence on intention of practicing SDM. Participants' intention to practice SDM was high following the workshop. | Level 2 - Commit to change | No direct link to patient outcomes, authors stated patients need SDM training |
|                 |      |         |                                      |                                                                                                                                                                                                                                       |                                    | online learning: 14 minutes                                   | EBP-focused online case-based training intervention.                                                                              | SDM and medication-prescribing concordance.                                                                                                                                                                                                                                           | increased by more than 15%.                                                                                                                                                                                                                              |                            |                                                                               |
| Kanzaria        | 2020 | USA     | 28 emergency medicine residents      | Perform SDM by role-playing in simulated patient encounters. To communicate risk and diagnostic options using a simulated patient scenario.                                                                                           | After-incorporating needs analysis | Blended learning: pre-course activities and one hour workshop | In-class session incorporated a short lecture outlining a framework for SDM, followed by role-playing through patient scenarios   | Needs analysis conducted before course where it was found EM residents had not received SDM training. Skills assessed using simulated patient encounter and checklist of critical actions. Resident                                                                                   | Two months after attending the workshop, over 75% of residents completed all elements of the SDM process in a simulated patient encounter; four residents required no prompting by the examiner.                                                         | Level 3                    | No patient outcomes reported                                                  |

Supplemental Table 2: SDM Courses

| Author          | Year | Country     | Cohort                                                 | Study aim                                                                                                                                                                                                                             | Design       | Setting & Duration  | Content & delivery                                                                                                                             | Outcome measures                                                                                                                                                                                                                                                                                               | Outcomes                                                                                                                                                                                                                                                  | Outcomes: NWKM             | Patient outcomes                                                                          |
|-----------------|------|-------------|--------------------------------------------------------|---------------------------------------------------------------------------------------------------------------------------------------------------------------------------------------------------------------------------------------|--------------|---------------------|------------------------------------------------------------------------------------------------------------------------------------------------|----------------------------------------------------------------------------------------------------------------------------------------------------------------------------------------------------------------------------------------------------------------------------------------------------------------|-----------------------------------------------------------------------------------------------------------------------------------------------------------------------------------------------------------------------------------------------------------|----------------------------|-------------------------------------------------------------------------------------------|
| Abbasgholizadeh | 2021 | Iran        | 41 healthcare professionals/trainees                   | Assess healthcare professionals' acceptance of and satisfaction with SDM workshop, its impact on their intention to use SDM, and their perceived facilitators and barriers to the implementation of SDM in clinical settings in Iran. | Before-after | Half-day workshop   | (1) overall concept of SDM, (2) SDM tools, and (3) measurement of SDM. Delivered using lectures & individual and group activities              | Participants completed several questionnaires: sociodemographic, familiarity with SDM, intention to implement SDM, facilitators and barriers of implementing SDM, continuous professional development reaction and workshop evaluation. Quantitative data was analysed descriptively. feedback after workshop. | Post- workshop, beliefs that practicing SDM would be beneficial and useful and beliefs about capability of using SDM had the strongest influence on intention of practicing SDM. Participants' intention to practice SDM was high following the workshop. | Level 2 - Commit to change | No direct link to patient outcomes, authors stated patients need SDM training             |
| Ritter          | 2019 | Switzerland | 27 Senior internal medicine residents from 3 hospitals | Use SDM in clinical practice.                                                                                                                                                                                                         | Before-after | Workshop: Two hours | Workshop and pocket card use in clinical practice. Encounters with patient actors were recorded and assessed shortly before and 2 months after | Performances assessed using a SDM OPTION scale (scores ranging from 0 to 100), a self-reported questionnaire, and patient actors rating the residents.                                                                                                                                                         | The mean (SD) score improved from 65 (SD 13) to 71 (SD 12; effect size [ES] 0.53; P ¼ .011). After training, participants were more comfortable with their SDM knowledge & skills and with practicing SDM. Residents applied SDM                          | Level 3-4                  | Patient actors rated the overall competence in discussing the treatment decision as high. |

Supplemental Table 2: SDM Courses

| Author          | Year | Country | Cohort                                     | Study aim                                                                                                                                                                                                                             | Design       | Setting & Duration                       | Content & delivery                                                                                                                         | Outcome measures                                                                                                                                                                                                                                                                      | Outcomes                                                                                                                                                                                                                                                 | Outcomes: NWKM             | Patient outcomes                                                              |
|-----------------|------|---------|--------------------------------------------|---------------------------------------------------------------------------------------------------------------------------------------------------------------------------------------------------------------------------------------|--------------|------------------------------------------|--------------------------------------------------------------------------------------------------------------------------------------------|---------------------------------------------------------------------------------------------------------------------------------------------------------------------------------------------------------------------------------------------------------------------------------------|----------------------------------------------------------------------------------------------------------------------------------------------------------------------------------------------------------------------------------------------------------|----------------------------|-------------------------------------------------------------------------------|
| Abbasgholizadeh | 2021 | Iran    | 41 healthcare professionals/trainees       | Assess healthcare professionals' acceptance of and satisfaction with SDM workshop, its impact on their intention to use SDM, and their perceived facilitators and barriers to the implementation of SDM in clinical settings in Iran. | Before-after | Half-day workshop                        | (1) overall concept of SDM, (2) SDM tools, and (3) measurement of SDM. Delivered using lectures & individual and group activities          | Participants completed several questionnaires: sociodemographic, familiarity with SDM, intention to implement SDM, facilitators and barriers of implementing SDM, continuous professional development reaction and workshop evaluation. Quantitative data was analysed descriptively. | Post-workshop, beliefs that practicing SDM would be beneficial and useful and beliefs about capability of using SDM had the strongest influence on intention of practicing SDM. Participants' intention to practice SDM was high following the workshop. | Level 2 - Commit to change | No direct link to patient outcomes, authors stated patients need SDM training |
|                 |      |         |                                            |                                                                                                                                                                                                                                       |              |                                          | completing a program.                                                                                                                      |                                                                                                                                                                                                                                                                                       | concepts more often in practice and patient actors felt more comfortable with how residents discussed their care                                                                                                                                         |                            |                                                                               |
| Rusiecki        | 2018 | USA     | 36 Senior Residents on ambulatory rotation | To increase senior residents' knowledge of, attitudes toward, & demonstration of SDM skills.                                                                                                                                          | Before-after | Integrated & didactic. Duration: 4 weeks | A 7-step curriculum using patient actors was developed. Week 1: participants provided clinical recordings. Week 2: 4-hour didactic session | Pre/post-curriculum surveys assessing knowledge of and attitudes toward SDM. Skills assessed via pre/post-curricular audio recordings of clinical decision-making by residents with their patients.                                                                                   | Significant improvement in knowledge (median score pre 75%, post 100%, $P < .01$ ) & confidence (median composite score pre-2.87, post 3.0, $P < .01$ ). 44 Clinical recordings (31 pre, 13 post) were assessed using the OPTION scale.                  | Level 3                    | No patient reports                                                            |



Supplemental Table 2: SDM Courses

| Author          | Year | Country | Cohort                               | Study aim                                                                                                                                                                                                                             | Design       | Setting & Duration | Content & delivery                                                                                                                                                                                                                                                                      | Outcome measures                                                                                                                                                                                                                                                                      | Outcomes                                                                                                                                                                                                                                                                                                                                                            | Outcomes: NWKM             | Patient outcomes                                                              |
|-----------------|------|---------|--------------------------------------|---------------------------------------------------------------------------------------------------------------------------------------------------------------------------------------------------------------------------------------|--------------|--------------------|-----------------------------------------------------------------------------------------------------------------------------------------------------------------------------------------------------------------------------------------------------------------------------------------|---------------------------------------------------------------------------------------------------------------------------------------------------------------------------------------------------------------------------------------------------------------------------------------|---------------------------------------------------------------------------------------------------------------------------------------------------------------------------------------------------------------------------------------------------------------------------------------------------------------------------------------------------------------------|----------------------------|-------------------------------------------------------------------------------|
| Abbasgholizadeh | 2021 | Iran    | 41 healthcare professionals/trainees | Assess healthcare professionals' acceptance of and satisfaction with SDM workshop, its impact on their intention to use SDM, and their perceived facilitators and barriers to the implementation of SDM in clinical settings in Iran. | Before-after | Half-day workshop  | (1) overall concept of SDM, (2) SDM tools, and (3) measurement of SDM. Delivered using lectures & individual and group activities<br><br>including practice with patient & feedback. Week 3: new recordings submitted. Week 4: two-hour debriefing, discussion about barriers, feedback | Participants completed several questionnaires: sociodemographic, familiarity with SDM, intention to implement SDM, facilitators and barriers of implementing SDM, continuous professional development reaction and workshop evaluation. Quantitative data was analysed descriptively. | Post-workshop, beliefs that practicing SDM would be beneficial and useful and beliefs about capability of using SDM had the strongest influence on intention of practicing SDM. Participants' intention to practice SDM was high following the workshop.<br><br>Improvement in use of SDM skills was seen among all residents (mean increase 1.84 points, P = .27). | Level 2 - Commit to change | No direct link to patient outcomes, authors stated patients need SDM training |

Supplemental Table 2: SDM Courses

| Author          | Year | Country | Cohort                                                  | Study aim                                                                                                                                                                                                                             | Design       | Setting & Duration                             | Content & delivery                                                                                                                | Outcome measures                                                                                                                                                                                                                                                                      | Outcomes                                                                                                                                                                                                                                                 | Outcomes: NWKM                          | Patient outcomes                                                              |
|-----------------|------|---------|---------------------------------------------------------|---------------------------------------------------------------------------------------------------------------------------------------------------------------------------------------------------------------------------------------|--------------|------------------------------------------------|-----------------------------------------------------------------------------------------------------------------------------------|---------------------------------------------------------------------------------------------------------------------------------------------------------------------------------------------------------------------------------------------------------------------------------------|----------------------------------------------------------------------------------------------------------------------------------------------------------------------------------------------------------------------------------------------------------|-----------------------------------------|-------------------------------------------------------------------------------|
| Abbasgholizadeh | 2021 | Iran    | 41 healthcare professionals/trainees                    | Assess healthcare professionals' acceptance of and satisfaction with SDM workshop, its impact on their intention to use SDM, and their perceived facilitators and barriers to the implementation of SDM in clinical settings in Iran. | Before-after | Half-day workshop                              | (1) overall concept of SDM, (2) SDM tools, and (3) measurement of SDM. Delivered using lectures & individual and group activities | Participants completed several questionnaires: sociodemographic, familiarity with SDM, intention to implement SDM, facilitators and barriers of implementing SDM, continuous professional development reaction and workshop evaluation. Quantitative data was analysed descriptively. | Post-workshop, beliefs that practicing SDM would be beneficial and useful and beliefs about capability of using SDM had the strongest influence on intention of practicing SDM. Participants' intention to practice SDM was high following the workshop. | Level 2 - Commit to change              | No direct link to patient outcomes, authors stated patients need SDM training |
| Worthington     | 2020 | USA     | 58 internal medicine and medicine/paediatrics residents | Improve resident knowledge of and comfort with contraception and SDM.                                                                                                                                                                 | Before-after | Didactic & active learning. Duration: One hour | A seven-step model of SDM was adapted. Included a didactic teaching session, instructional video and interactive discussion.      | To assess trainee comfort, knowledge, and attitudes pre- and post-workshop surveys used.                                                                                                                                                                                              | Residents reported improvement in contraception knowledge (overall mean pre-curriculum = 57%, post-curriculum = 70%, $p < .001$ ) and comfort with contraception counselling (overall mean pre-curriculum = 3.2, post-curriculum = 3.6, $p < .01$ ).     | Level 3 self-reported behaviour changes | No patient outcomes reported                                                  |
