# Supplementary material
Source: HighWire-hosted journal article supplement (https://bmjopen.bmj.com/content/12/4/e057335)
Supplement: inline-supplementary-material-4 [file inline-supplementary-material-4.pdf]

Supplemental Table 3 SDM-EBM Course

| First Author | Year | Country | Cohort                                                                 | Study aim                                                                       | Design                     | Setting & Duration                                                                                                                                     | Content & delivery                                                                                                                                                                                      | Outcome measures                                                                                                          | Outcomes                                                                                                                                                                                                                                                                                                                                                                                                                                                            | Outcomes: NWKM* | Patient outcomes/involvement |
|--------------|------|---------|------------------------------------------------------------------------|---------------------------------------------------------------------------------|----------------------------|--------------------------------------------------------------------------------------------------------------------------------------------------------|---------------------------------------------------------------------------------------------------------------------------------------------------------------------------------------------------------|---------------------------------------------------------------------------------------------------------------------------|---------------------------------------------------------------------------------------------------------------------------------------------------------------------------------------------------------------------------------------------------------------------------------------------------------------------------------------------------------------------------------------------------------------------------------------------------------------------|-----------------|------------------------------|
| Hinneburg    | 2020 | Germany | 29 participants in 2 trials: 20 physicians working as resident doctors | Develop a pilot study to enhance competencies in evidence-based decision-making | Before-after mixed methods | Blended learning. Web-based learning (3 hours over 2 weeks) & 2 face-to-face learning blocks (18 hours over 4 days each). Problem-Based Learning used. | 6 Modules introduction, treatment studies, systematic literature search, systematic reviews and guidelines, diagnostic studies & application of evidence-based decision-making using role play and SDM. | Focus group interviews and observation, Critical Health Competence test (CHC test) to assess critical health competencies | Critical health competences increased significantly after the training. Mean values ( $\pm$ SD) of levels of competence were 571.21 ( $\pm$ 82.87) before training and 671.90 ( $\pm$ 51.38) after training ( $p < 0.0001$ ). SDM role plays showed relevant statistical concepts were insufficiently understood (e.g. The difference between the benefits and harms of a diagnostic test). SDM Role plays: some participants didn't focus on SDM during role plays | Level 3         | No patient outcomes reported |
